# Supplementary material for: Trace analysis of dimethoxytrityl alcohol (DMT-OH) in oligonucleotide matrices using liquid chromatography coupled with tandem mass spectrometry
Source: Royal Society of Chemistry journal article supplement (doi:10.1039/d2ay02020c), 2023-01-01
Supplement: d2ay02020c1.pdf [file d2ay02020c1.pdf]

## Supplementary Information

### Trace Analysis of Dimethoxytrityl Alcohol (DMT-OH) in Oligonucleotide Matrices Using Liquid Chromatography Coupled with Tandem Mass Spectrometry

Bing Guan,<sup>\*a</sup> Wuming Yan <sup>a</sup> and Jessica A. Stolee <sup>b</sup>

<sup>\*</sup> Corresponding author

<sup>a</sup>. Formerly of Biogen Inc. Current affiliation: Iveric Bio, Inc., Parsippany, New Jersey, USA.

<sup>b</sup>. Biogen Inc., Cambridge, Massachusetts, USA.

#### S1. Analysis of DMT-OH by LC-UV

Table S1. Raw data used to evaluate LC-UV (230 nm) LOQ

| DMT-OH Concentration (ng/mL) | UV230 nm peak area after blank subtraction |
|------------------------------|--------------------------------------------|
| 32                           | 1.20                                       |
| 64                           | 2.74                                       |
| 128                          | 6.98                                       |
| 256                          | 15.99                                      |
| 512                          | 34.91                                      |

Standard deviation ( $\sigma$ ) was calculated to be 0.365 via MS-Excel LINEST function.

LOQ =  $10 * \sigma / \text{slope} = 10 * 0.365 / 0.071 = 51 \text{ ng/m}$

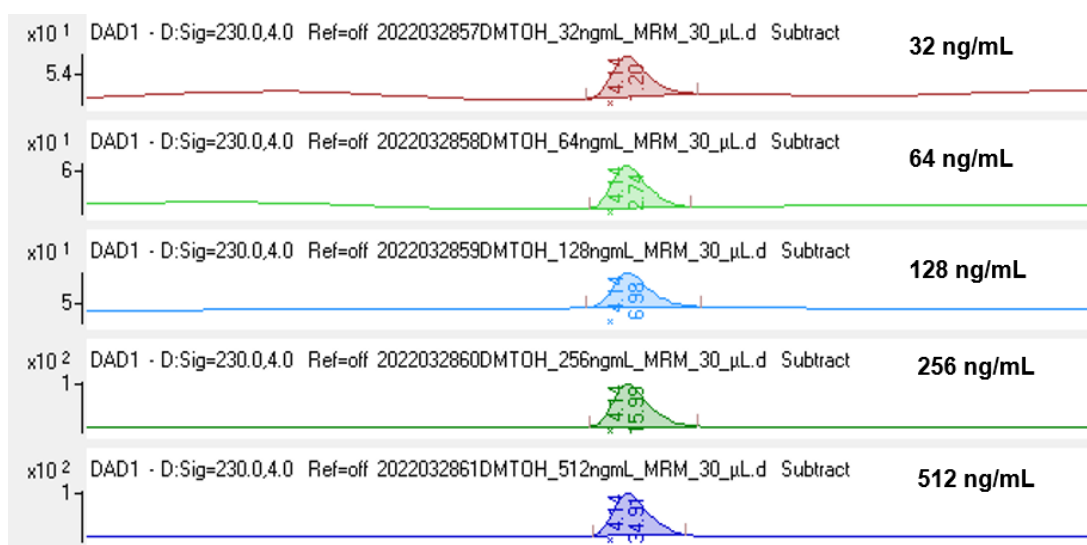

Figure S1. Absorption of UV 230 nm at various DMT-OH concentrations. Blank subtraction was performed via Agilent MassHunter Qualitative Analysis Software

## S2. Analysis of DMT-OH by LC-MS (SIM)

Table S2. Raw data used to evaluate LC-MS (SIM) LOQ

| DMT-OH Concentration (ng/mL) | (-) SIM 319 peak area without blank subtraction |
|------------------------------|-------------------------------------------------|
| 50                           | 167                                             |
| 100                          | 404                                             |
| 200                          | 846                                             |
| 300                          | 1586                                            |
| 400                          | 2299                                            |

Standard deviation ( $\sigma$ ) was calculated to be 96.0 via MS-Excel LINEST function.

LOQ =  $10 * \sigma / \text{slope} = 10 * 96.0 / 6.1 = 157 \text{ ng/mL}$

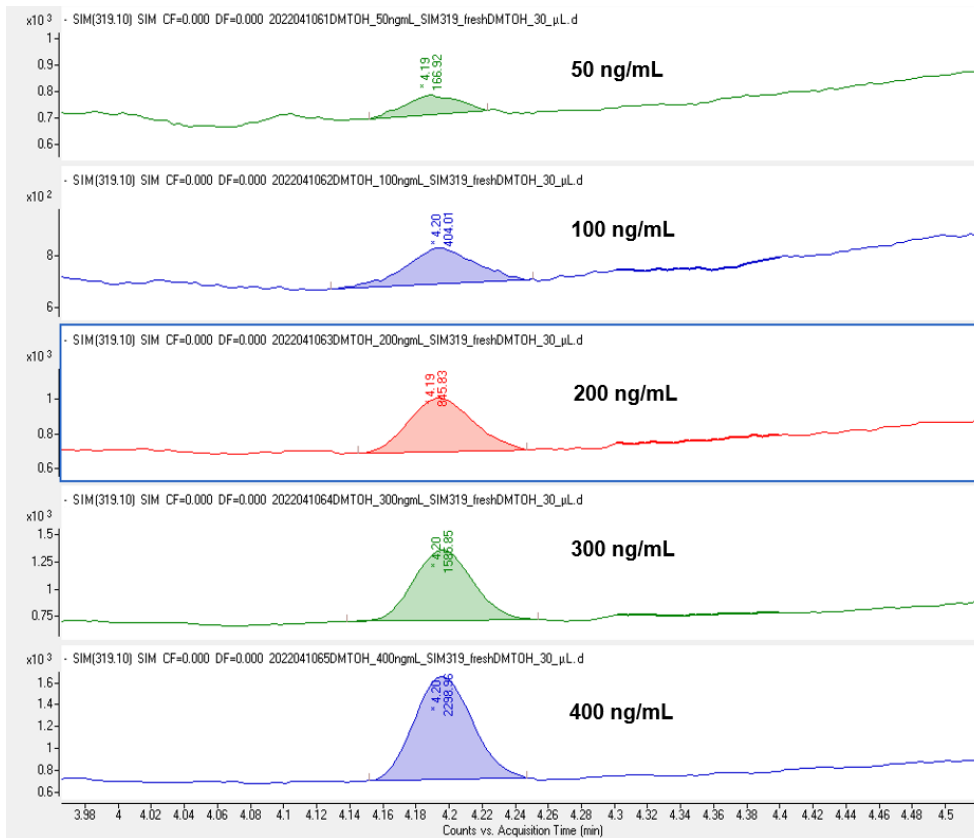

Figure S2. Chromatograms of SIM (m/z: -319.0) at various DMT-OH concentrations

### S3. Analysis of DMT-OH by LC-MS/MS (MRM)

Table S3. Raw data used for LC-MS/MS (MRM) linearity

| DMT-OH standard conc. (ng/mL) | DMTOH MRM195 Results after Blank Subtraction |               |
|-------------------------------|----------------------------------------------|---------------|
|                               | RT (min)                                     | MRM Peak Area |
| 0.5                           | 4.2160                                       | 194           |
| 1                             | 4.2142                                       | 388           |
| 2                             | 4.2160                                       | 695           |
| 4                             | 4.2142                                       | 1695          |
| 8                             | 4.2142                                       | 3774          |
| 16                            | 4.2142                                       | 8133          |
| 32                            | 4.2142                                       | 19331         |
| 64                            | 4.2142                                       | 41688         |

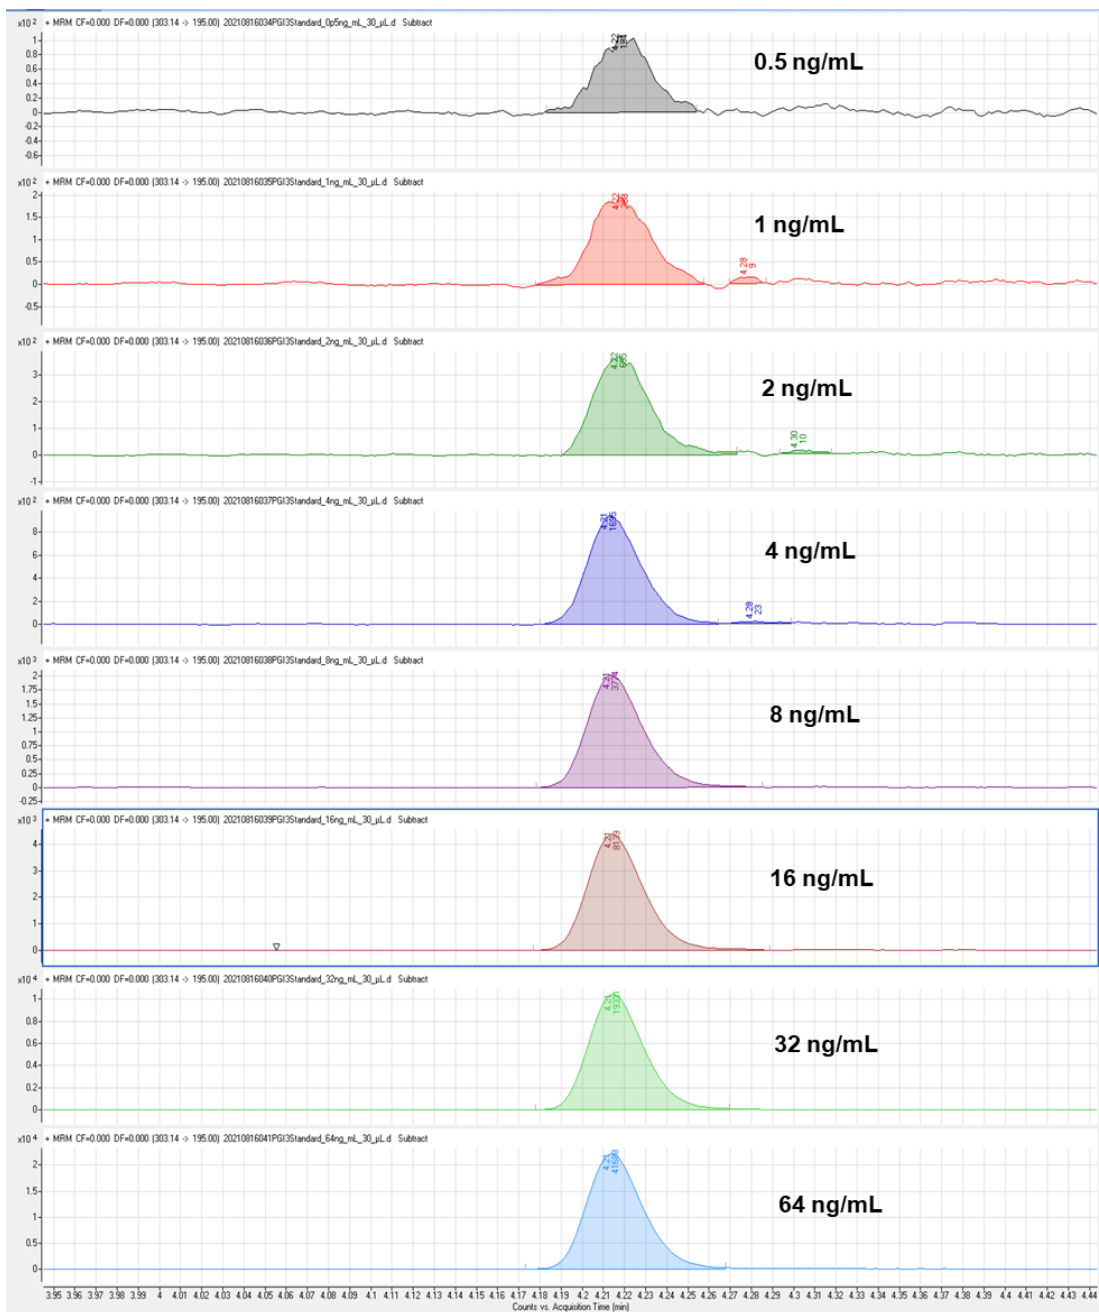

**Figure S3. MRM (m/z: 303 --> 195) at various DMT-OH concentrations. Blank subtraction was performed via Agilent MassHunter Qualitative Analysis Software**

LOQ was evaluated based on five concentrations (0.5 to 8 ng/mL). The standard deviation ( $\sigma$ ) was calculated to be 77.5 via MS-Excel LINEST function.

$$\text{LOQ} = 10 * \sigma / \text{slope} = 10 * 77.5 / 482.1 = 1.6 \text{ ng/mL}$$
